# Supplementary material for: A decacationic ferrocene-based metallostar
Source: Royal Society of Chemistry journal article supplement (doi:10.1039/d2sc06151a), 2022-12-28
Supplement: d2sc06151a1.pdf [file d2sc06151a1.pdf]

## SUPPORTING INFORMATION

---

### **A Decacationic Ferrocene-Based Metallostar**

Susanne M. Rupf, Amina L. Moshtaha, Moritz Malischewski\*

## SUPPORTING INFORMATION

---

### Table of Contents

|                               |   |
|-------------------------------|---|
| Experimental Procedures ..... | 1 |
| General Procedures .....      | 1 |
| Syntheses .....               | 2 |
| Crystallographic Data .....   | 4 |
| References .....              | 5 |
| Appendix.....                 | 6 |

## Experimental Procedures

### General Procedures

**CAUTION:** Mercury compounds are highly toxic. Therefore, the chemicals should be handled under a well-ventilated fume hood. Great care must be taken that organomercury compounds are not spilled on the skin. It is advisable to use multiple layers of impenetrable gloves and to remove the outer layer immediately if material is spilled on it. The face might be protected against splashes by using a face shield. Due to the hazardous effects of mercury on the environment, great care must be taken to prevent contamination of the wastewater with mercury. Moreover, SbF<sub>5</sub> and aHF are highly dangerous compounds with devastating effects on human tissue. They should only be handled in appropriate equipment by trained personnel. SO<sub>2</sub> and aHF are (toxic) gases at room temperature.

Commercially available chemicals were used as received, unless otherwise noted. SbF<sub>5</sub> was stored inside a glove box. Oxygen- and moisture-sensitive compounds were handled using Schlenk techniques and/or handled and stored in an argon-filled glovebox (O<sub>2(g)</sub> and H<sub>2</sub>O<sub>(g)</sub> < 0.1 ppm). SO<sub>2</sub> was distilled from CaH<sub>2</sub> and stored in a stainless-steel cylinder. Reactions involving SO<sub>2</sub>, aHF and SbF<sub>5</sub> were performed in PFA (tetrafluoroethylene-perfluoroalkoxyvinyl-copolymer) tubes connected to stainless-steel valves. Instead of stirring, the mixtures were agitated with the help of the Mini-Vortex Mixer PV-1. [FeC<sub>10</sub>(HgO<sub>2</sub>CCF<sub>3</sub>)<sub>10</sub>]<sup>[1]</sup> and [C<sub>5</sub>F<sub>5</sub>NH][SbF<sub>6</sub>]<sup>[2]</sup> were synthesized according to the literature procedure. Anhydrous MeCN and DCM were obtained from the solvent system FMBRAUN MB SPS-800. THT, MeCN and C<sub>5</sub>F<sub>5</sub>N as well as deuterated solvents were stored in Young flasks under argon atmosphere over molar sieve (3 Å) which was dried beforehand at 250 °C under high vacuum. Solvents were degassed by three freeze-pump-thaw cycles.

<sup>1</sup>H, <sup>13</sup>C and <sup>19</sup>F NMR spectra were recorded on a Bruker AVANCE III 700 spectrometer by using 6mm NMR glass tubes. All reported chemical shifts (δ) are referenced to the  $\delta$  values given in IUPAC recommendations of 2008 using the <sup>2</sup>H signal of the deuterated solvent as internal reference.<sup>[3]</sup> All chemical shifts (δ) are given in parts per million (ppm) and the signals are specified according to the multiplicity (s = singlet, d = doublet, t = triplet, q = quartet, m = multiplet, br = broad) and the coupling constants *J* in Hz. The program MestRe Nova Version 14.0.1 was used to evaluate and plot the data.<sup>[4]</sup>

Infrared spectra were measured using a Thermo-Scientific Nicolet iS10 FTIR spectrometer with DuraSamplIR accessory in attenuated total reflection at room temperature or on a Bruker ALPHA FT-IR spectrometer inside a glovebox equipped with a diamond ATR attachment. Raman spectra were recorded on a Bruker MultiRAM II equipped with a low-temperature Ge detector (1064 nm, 30-80 mW, resolution 2 cm<sup>-1</sup>). The software OriginPro 2017G was used to plot the data.<sup>[5]</sup>

Cyclic voltammetry was performed on an Interface 1010 B Potentiostat/Galvanostat/ZRA from Gamry Instruments. The investigations were carried out starting from 0 V going to the oxidation first and then to the reduction. The measurements were performed in anhydrous and oxygen free solvents under argon atmosphere without supporting electrolyte and platinum wires as working-, counter-, and quasi-reference electrodes. The voltammograms were internally referenced against FeCp<sub>2</sub><sup>0/+</sup>. The software OriginPro 2017G was used to plot the data.<sup>[5]</sup>

X-Ray data were collected on a BRUKER D8 Venture system. Data were collected at 100(2) K using graphite-monochromated Mo K<sub>α</sub> radiation (λ<sub>α</sub> = 0.71073 Å) or a Cu K<sub>α</sub> radiation (λ = 1.54178). The strategy for the data collection was evaluated by using the Smart software. The data were collected by the standard “ $\psi$ - $\omega$  scan techniques” and were scaled and reduced using SAINT+software. The structures were solved by using Olex2,<sup>[6]</sup> the structure was solved with the XT<sup>[7]</sup> structure solution program using Intrinsic Phasing and refined with the XL refinement package<sup>[8,9]</sup> using Least Squares minimization. If it is noted, bond length and angles were measured with Diamond Crystal and Molecular Structure Visualization Version 4.6.2.<sup>[10]</sup> Drawings were generated with POV-Ray.<sup>[11]</sup> Deposition numbers CCDC 2214089 ([FeC<sub>10</sub>(HgDMP)<sub>10</sub>][TFA]<sub>10</sub>), 2213962 ([FeC<sub>10</sub>(HgTHT)<sub>10</sub>][SbF<sub>6</sub>]<sub>10</sub> · 24 MeCN) and 2213956 ([FeCp<sub>2</sub>(HgMeCN)<sub>10</sub>][SbF<sub>6</sub>]<sub>10</sub>[MoF<sub>6</sub>] · 2 SO<sub>2</sub> · 10 HF) contain the supplementary crystallographic data for this paper. These data are provided free of charge by the joint Cambridge Crystallographic Data Centre and Fachinformationszentrum Karlsruhe Access Structures service [www.ccdc.cam.ac.uk/structures](http://www.ccdc.cam.ac.uk/structures).

Elemental analysis was performed with Vario EL elemental analyser (Elementar, Germany). UV/vis spectra were recorded on a Varian Cary 50 Bio photo spectrometer (xenon lamp) by using Suprasil quartz cuvettes (d = 1 cm) equipped with a Schlenk valve cock. Observed spectra are consistent with those of ferrocene and ferrocenium salts.<sup>[12,13]</sup>

## Syntheses

 $[\text{FeC}_{10}\text{Hg}_{10}\text{dmap}_{10}][\text{TFA}]_{10}$  (**1**)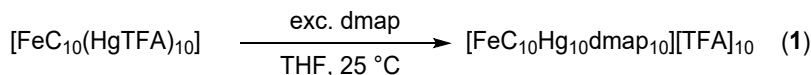

In a 100 mL round bottom flask  $[\text{FeC}_{10}(\text{HgTFA})_{10}]$  (580 mg, 0.175 mmol, 1.0 eq.) was dissolved in THF (25 mL). Then, dmap (370 mg, 3.03 mmol, 17 eq.) was added to the solution at room temperature, yielding an orange precipitate. The precipitate was filtered off, washed with THF (50 mL) and *n*-pentane (50 mL) and dried at high vacuum. The compound  $[\text{FeC}_{10}(\text{HgDMAP})_{10}][\text{TFA}]_{10}$  (425 mg, 0.093 mmol, 57%) was obtained as orange powder. Single crystals were obtained by diffusion of  $[\text{FeC}_{10}(\text{HgTFA})_{10}]$  and DMAP in tetrahydrofuran in a H-tube. **<sup>1</sup>H NMR** (600 MHz,  $\text{CD}_2\text{Cl}_2$ , r.t.):  $\delta$  [ppm] = 8.27 (m, 2H), 6.50 (m, 2H), 3.05 (s, 6H). **<sup>13</sup>C{<sup>1</sup>H} NMR** (101 MHz,  $\text{CD}_2\text{Cl}_2$ , r.t.):  $\delta$  [ppm] = 161.4 (q,  $J$  = 34.3 Hz), 155.7, 148.8, 118.4 (q,  $J$  = 296.5 Hz), 106.9, 100.8, 39.6. **<sup>19</sup>F NMR** (565 MHz,  $\text{CD}_2\text{Cl}_2$ , r.t.)  $\delta$  [ppm] = -74.7 (s). **FT-IR** (ATR):  $\tilde{\nu}$  [ $\text{cm}^{-1}$ ] = 3094, 2931, 1790, 1621, 1549, 1446, 1396, 1235, 1196, 1174, 1122, 1072, 1023, 947, 813, 798, 718. **Raman** (1064 nm, r.t.):  $\tilde{\nu}$  [ $\text{cm}^{-1}$ ] = 3094, 2937, 2905, 2869, 2823, 1636, 1624, 1549, 1448, 1418, 1301, 1237, 1077, 951, 827, 765, 662, 595, 193, 100. **Elemental analysis**: m[%] = calculated: N: 6.41, C: 24.72, H: 1.38, found: N: 6.43, C: 24.76, H: 1.28.

 $[(\text{FeC}_{10}\text{Hg}_{10}(\text{solv.})_n)[\text{SbF}_6]_{10}$  (**2**)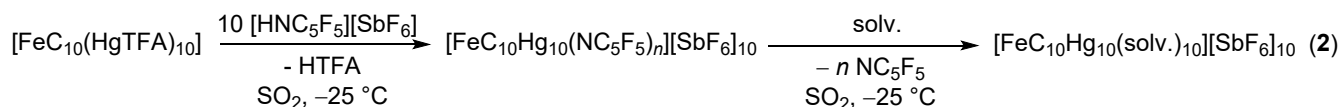

**2a** – solv. =  $\text{C}_5\text{F}_5\text{N}$ : Pentafluoropyridinium hexafluoroantimonate (2.99 g, 7.38 mmol, 10 eq.) was filled in a 12 mm PFA tube under an atmosphere of argon. Sulfur dioxide was condensed at  $-196 ^\circ\text{C}$  into the reaction tube. Subsequently, the reaction mixture was brought to  $-10 ^\circ\text{C}$  and mechanically shaken until a colourless solution was obtained. The mixture was brought to  $-196 ^\circ\text{C}$  again, followed by addition of  $[\text{FeC}_{10}(\text{HgTFA})_{10}]$  (2.45 g, 0.738 mmol, 1.0 eq.). The mixture was warmed up to  $0 ^\circ\text{C}$  until a deep red solution was obtained. Sulfur dioxide was evaporated under reduced pressure and the product (4.60 g, 0.738 mmol, quant.) was obtained as orange, amorphous solid. The compound was stored in a glovebox under argon atmosphere. **FT-IR** (ATR):  $\tilde{\nu}$  [ $\text{cm}^{-1}$ ] = 3345, 1778, 1668, 1615, 1545, 1516, 1489, 1324, 1186, 1112, 1077, 998, 978, 660, 633, 555. **Raman** (1064 nm, r.t.):  $\tilde{\nu}$  [ $\text{cm}^{-1}$ ] = 939, 650, 639, 602, 522, 497, 458, 359, 279, 112.

$[\text{FeC}_{10}\text{Hg}_{10}(\text{NC}_5\text{F}_5)_n][\text{SbF}_6]_{10}$  was placed in a flame dried 20 mL Schlenk tube. Anhydrous donor solvent (solv., ca. 0.1 mL) was added yielding a red solution. The solvent was evaporated in an oil pump vacuum of  $10^{-3}$  mbar to afford the product as pink, amorphous solid.

**2b** – solv. = THT:  $[\text{FeC}_{10}\text{Hg}_{10}(\text{NC}_5\text{F}_5)_n][\text{SbF}_6]_{10}$  (100.0 mg, 0.016 mmol, 1.0 eq.), THT (ca. 1 mL),  $[\text{FeC}_{10}\text{Hg}_{10}(\text{THT})_{10}][\text{SbF}_6]_{10}$  (87.3 mg, 0.016 mmol, quant.). Single crystals were obtained, by slow cooling of **2b** dissolved in MeCN from r.t. to  $-35 ^\circ\text{C}$ . **<sup>1</sup>H NMR** (600 MHz, MeCN- $d_3$ , r.t.)  $\delta$  [ppm] = 3.64 (m, 4H), 2.24 (m, 4H). **<sup>13</sup>C NMR** (151 MHz, MeCN- $d_3$ , r.t.)  $\delta$  [ppm] = 111.8, 31.6. **<sup>19</sup>F NMR** (565 MHz, MeCN- $d_3$ , r.t.)  $\delta$  [ppm] = -120.3 (m). **FT-IR** (ATR):  $\tilde{\nu}$  [ $\text{cm}^{-1}$ ] = 3607, 3535, 2955, 2869, 1629, 1491, 1435, 1275, 1260, 1194, 1143, 1077, 975, 957, 883, 811, 656, 635, 559, 518, 472. **Raman** (1064 nm, r.t.):  $\tilde{\nu}$  [ $\text{cm}^{-1}$ ] = strong fluorescence. **Elemental analysis**: m[%] = calculated : N: 0.00, C: 11.08, H: 1.49, S: 5.91, found: N: 0.00, C: 11.88, H: 1.66, S: 5.35.

**2c** – solv. = MeCN:  $[\text{FeC}_{10}\text{Hg}_{10}(\text{NC}_5\text{F}_5)_n][\text{SbF}_6]_{10}$  (25.0 mg, 4.01  $\mu\text{mol}$ , 1.0 eq.), MeCN (0.1 mL),  $[\text{FeC}_{10}\text{Hg}_{10}(\text{MeCN})_{10}][\text{SbF}_6]_{10}$  (19.9 mg, 4.01  $\mu\text{mol}$ , quant.). **<sup>1</sup>H NMR** (700 MHz, MeCN- $d_3$ , r.t.)  $\delta$  [ppm] = 1.96 (s). **<sup>13</sup>C NMR** (176 MHz, MeCN- $d_3$ , r.t.)  $\delta$  [ppm] = 108.3 (s), 97.7 (s), 1.2 (q,  $J$  = 20.7 Hz). **<sup>19</sup>F NMR** (565 MHz, MeCN- $d_3$ , r.t.)  $\delta$  [ppm] = -120.3 (m). **FT-IR** (ATR):  $\tilde{\nu}$  [ $\text{cm}^{-1}$ ] = 3015, 2947, 2331, 2305, 2247, 1416, 1368, 1215, 1162, 1032, 957, 795, 651, 638, 560. **Raman** (1064 nm, r.t.):  $\tilde{\nu}$  [ $\text{cm}^{-1}$ ] = strong fluorescence. **Elemental analysis**: m[%] = calculated : N: 2.83, C: 7.28, H: 0.61, found: N: 2.75, C: 7.45, H: 1.24.

## SUPPORTING INFORMATION

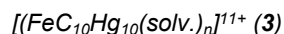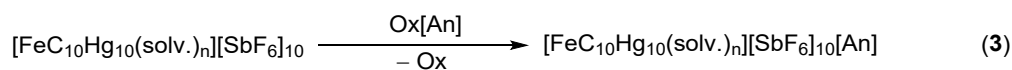

**Table S1.** Summary of oxidation attempts. Orange-red solution – Fe(II), green/blue solution – Fe(III).

| starting material                                                                                                   | oxidant                                    | solvent         | observation      |
|---------------------------------------------------------------------------------------------------------------------|--------------------------------------------|-----------------|------------------|
| [(FeC <sub>10</sub> Hg <sub>10</sub> (NC <sub>5</sub> F <sub>5</sub> ) <sub>n</sub> )] <sup>11+</sup> ( <b>3a</b> ) | NOBF <sub>4</sub> (8.6 eq.)                | SO <sub>2</sub> | brown suspension |
|                                                                                                                     | NO <sub>2</sub> SbF <sub>6</sub> (2.1 eq.) | SO <sub>2</sub> | green solution   |
| [(FeC <sub>10</sub> Hg <sub>10</sub> (THT) <sub>10</sub> )] <sup>11+</sup> ( <b>3b</b> )                            | AgSbF <sub>6</sub>                         | dcm             | no reaction      |
|                                                                                                                     | NOBF <sub>4</sub> (5.0 eq.)                | SO <sub>2</sub> | green solution   |
|                                                                                                                     | NO <sub>2</sub> SbF <sub>6</sub> (1.0 eq.) | SO <sub>2</sub> | green solution   |
|                                                                                                                     | MoF <sub>6</sub> (11.0 eq.)                | SO <sub>2</sub> | green solution   |
| [(FeC <sub>10</sub> Hg <sub>10</sub> (MeCN) <sub>n</sub> )] <sup>11+</sup> ( <b>3c</b> )                            | NOBF <sub>4</sub> (2.7 eq.)                | SO <sub>2</sub> | blue solution    |
|                                                                                                                     | NO <sub>2</sub> SbF <sub>6</sub> (1.8 eq.) | SO <sub>2</sub> | blue solution    |
|                                                                                                                     | MoF <sub>6</sub> (12.0 eq.)                | SO <sub>2</sub> | blue solution    |

**3c** – solv. = MeCN: [FeC<sub>10</sub>Hg<sub>10</sub>(MeCN)<sub>10</sub>][SbF<sub>6</sub>]<sub>10</sub> (39.6 mg, 0.008 mmol, 1.0 eq.) was filled in an 8 mm PFA tube under an atmosphere of argon and dissolved in liquid SO<sub>2</sub> (1 mL). Then, MoF<sub>6</sub> (20.00 mg, 0.095 mmol, 11.9 eq.) was added at –196 °C. The reaction mixture was brought to –10 °C and mechanically shaken until a dark blue solution was obtained. All liquid components were evaporated under reduced pressure and the product (41.5 mg, 0.008 mmol, quant.) was obtained as blue solid and stored under argon. Single crystals were obtained by recrystallisation from HF/SO<sub>2</sub> at –74 °C. **FT-IR** (ATR):  $\tilde{\nu}$  [cm<sup>–1</sup>] = 2942, 2332, 2306, 2247, 1552, 1408, 1374, 1221, 1167, 1019, 957, 865, 653, 634, 557, 520. **Raman** (1064 nm, r.t.):  $\tilde{\nu}$  [cm<sup>–1</sup>] = 2949, 2339, 2991, 2248, 1369, 945, 644, 393, 364, 125.

## Crystallographic Data

Table S2. Crystallographic data.

| Compound                                    | [FeC <sub>10</sub> (HgDMP) <sub>10</sub> ][TFA] <sub>10</sub>                                       | [FeC <sub>10</sub> (HgTHT) <sub>10</sub> ][SbF <sub>6</sub> ] <sub>10</sub> · 24 MeCN                                | [FeCp <sub>2</sub> (HgMeCN) <sub>10</sub> ][SbF <sub>6</sub> ] <sub>10</sub> [MoF <sub>6</sub> ] · 2 SO <sub>2</sub> · 10 HF         |
|---------------------------------------------|-----------------------------------------------------------------------------------------------------|----------------------------------------------------------------------------------------------------------------------|--------------------------------------------------------------------------------------------------------------------------------------|
| Empirical formula                           | FeC <sub>98</sub> Hg <sub>10</sub> N <sub>20</sub> H <sub>100</sub> O <sub>18</sub> F <sub>27</sub> | C <sub>98</sub> F <sub>60</sub> FeH <sub>150</sub> Hg <sub>10</sub> N <sub>24</sub> S <sub>10</sub> Sb <sub>10</sub> | C <sub>30</sub> F <sub>88</sub> FeH <sub>42</sub> Hg <sub>10</sub> MoN <sub>10</sub> O <sub>12</sub> S <sub>6</sub> Sb <sub>10</sub> |
| Formula weight                              | 4420.72                                                                                             | 6404.26                                                                                                              | 5974.28                                                                                                                              |
| Temperature/K                               | 100                                                                                                 | 100.0                                                                                                                | 100                                                                                                                                  |
| Crystal system                              | monoclinic                                                                                          | monoclinic                                                                                                           | triclinic                                                                                                                            |
| Space group                                 | P2 <sub>1</sub> /n                                                                                  | C2/c                                                                                                                 | P-1                                                                                                                                  |
| a/Å                                         | 16.8907(4)                                                                                          | 18.7149(8)                                                                                                           | 11.5091(7)                                                                                                                           |
| b/Å                                         | 40.5278(10)                                                                                         | 36.9102(16)                                                                                                          | 16.0047(12)                                                                                                                          |
| c/Å                                         | 23.0130(5)                                                                                          | 32.7166(14)                                                                                                          | 16.9690(11)                                                                                                                          |
| α/°                                         | 90                                                                                                  | 90                                                                                                                   | 78.893(3)                                                                                                                            |
| β/°                                         | 109.0010(10)                                                                                        | 94.377(2)                                                                                                            | 83.202(2)                                                                                                                            |
| γ/°                                         | 90                                                                                                  | 90                                                                                                                   | 80.190(3)                                                                                                                            |
| Volume/Å <sup>3</sup>                       | 14895.0(6)                                                                                          | 22533.8(17)                                                                                                          | 3010.4(4)                                                                                                                            |
| Z                                           | 4                                                                                                   | 4                                                                                                                    | 1                                                                                                                                    |
| ρ <sub>calc</sub> /g·cm <sup>-3</sup>       | 1.971                                                                                               | 1.888                                                                                                                | 3.295                                                                                                                                |
| μ/mm <sup>-1</sup>                          | 19.530                                                                                              | 8.197                                                                                                                | 15.392                                                                                                                               |
| F(000)                                      | 8164                                                                                                | 11768.0                                                                                                              | 2654.0                                                                                                                               |
| Crystal size/mm <sup>3</sup>                | 0.5 × 0.44 × 0.39                                                                                   | 0.5 × 0.38 × 0.33                                                                                                    | 0.26 × 0.18 × 0.15                                                                                                                   |
| Crystal shape                               | block                                                                                               | block                                                                                                                | block                                                                                                                                |
| Radiation                                   | CuKα (λ=1.54178)                                                                                    | MoKα (λ = 0.71073)                                                                                                   | MoKα (λ = 0.71073)                                                                                                                   |
| 2θ range for data collection/°              | 4.61 to 134.364                                                                                     | 3.966 to 50.328                                                                                                      | 4.18 to 56.594                                                                                                                       |
| Index ranges                                | -20 ≤ h ≤ 20, -48 ≤ k ≤ 48, -27 ≤ l ≤ 27                                                            | -22 ≤ h ≤ 22, -44 ≤ k ≤ 44, -39 ≤ l ≤ 39                                                                             | -15 ≤ h ≤ 15, -21 ≤ k ≤ 21, -22 ≤ l ≤ 22                                                                                             |
| Reflections collected                       | 416111                                                                                              | 325039                                                                                                               | 66569                                                                                                                                |
| Independent reflections                     | 26601 [R <sub>int</sub> = 0.0781, R <sub>sigma</sub> = 0.0277]                                      | 20131 [R <sub>int</sub> = 0.0376, R <sub>sigma</sub> = 0.0141]                                                       | 14855 [R <sub>int</sub> = 0.0291, R <sub>sigma</sub> = 0.0243]                                                                       |
| Data/restraints/parameters                  | 26601/1/1710                                                                                        | 20131/0/911                                                                                                          | 14855/0/660                                                                                                                          |
| Goodness-of-fit on F <sup>2</sup>           | 1.052                                                                                               | 1.040                                                                                                                | 1.083                                                                                                                                |
| Final R indexes [I>=2σ(I)]                  | R <sub>1</sub> = 0.0519, wR <sub>2</sub> = 0.1389                                                   | R <sub>1</sub> = 0.0384, wR <sub>2</sub> = 0.1055                                                                    | R <sub>1</sub> = 0.0309, wR <sub>2</sub> = 0.0702                                                                                    |
| Final R indexes [all data]                  | R <sub>1</sub> = 0.0569, wR <sub>2</sub> = 0.1439                                                   | R <sub>1</sub> = 0.0426, wR <sub>2</sub> = 0.1095                                                                    | R <sub>1</sub> = 0.0344, wR <sub>2</sub> = 0.0717                                                                                    |
| Largest diff. peak/hole / e·Å <sup>-3</sup> | 3.38/-1.87                                                                                          | 2.14/-1.87                                                                                                           | 2.75/-2.47                                                                                                                           |

In the crystal structure of  $[\text{FeC}_{10}(\text{HgTHT})_{10}][\text{SbF}_6]_{10} \cdot 24 \text{ MeCN}$  the iron atoms produce a hexagonal closed arrangement along the ac-plane with an AB-stacking pattern (Fig. S20). However, the iron atoms of layer B are not found within the trigonal voids similar to the Mg-type but displaced along the c-axis causing a number of surrounding iron atoms of ten instead twelve as expected for a Mg-type packing. Considering only the centers of gravity for all molecular entities, no simple packing arrangement is observed for the anionic units as they are not located neither within the tetrahedral nor in the octahedral voids. For the THT-structure the decacation is surrounded by 20 anions but due to disordering of the anions no ordered arrangement of Sb atoms is visible.

### References

- [1] S. M. Rupf, G. Schröder, R. Sievers, M. Malischewski, *Chem. Eur. J.* **2021**, 27, 5125–5129.
- [2] S. L. Bell, R. D. Chambers, K. R. Musgrave, J. G. Thorpe, *J. Fluor. Chem.* **1971**, 1, 51–57.
- [3] R. K. Harris, E. D. Becker, S. M. C. de Menezes, P. Granger, R. E. Hoffmann, K. W. Zilm, *Pure Appl. Chem.* **2008**, 80, 59.
- [4] M. R. Willcott, *J. Am. Chem. Soc.* **2009**, 131, 13180.
- [5] *Origin(Pro)*, Version 2016, OriginLab Corporation, Northhampton, Massachusetts, USA, **2016**.
- [6] O. V. Dolomanov, L. J. Bourhis, R. J. Gildea, J. A. K. Howard, H. Puschmann, *J. Appl. Cryst.* **2009**, 42, 339–341.
- [7] G. M. Sheldrick, *Acta Cryst.* **2015**, A71, 3–8.
- [8] G. M. Sheldrick, *SHELXL Version 2014/7*, Program for Crystal Structure Solution and Refinement, Göttingen, Germany, **2014**.
- [9] G. M. Sheldrick, *Acta Cryst.* **2008**, A64, 112–122.
- [10] K. Brandenburg, “Diamond: Crystal and Molecular Structure Visualization,” can be found under <http://www.crystalimpact.com/diamond>, **2017**.
- [11] Persistence of Vision Pty. Ltd., **2004**.
- [12] Y. S. Sohn, D. N. Hendrickson, H. B. Gray, *J. Am. Chem. Soc.* **1971**, 93, 3603–3612.
- [13] H. Ju, B. Ye, J. Gu, *Sensors* **2004**, 4, 71–83.

## Appendix

### Spectra

$[\text{FeC}_{10}(\text{HgDMAP})_{10}][\text{TFA}]_{10}$  (**1a**):

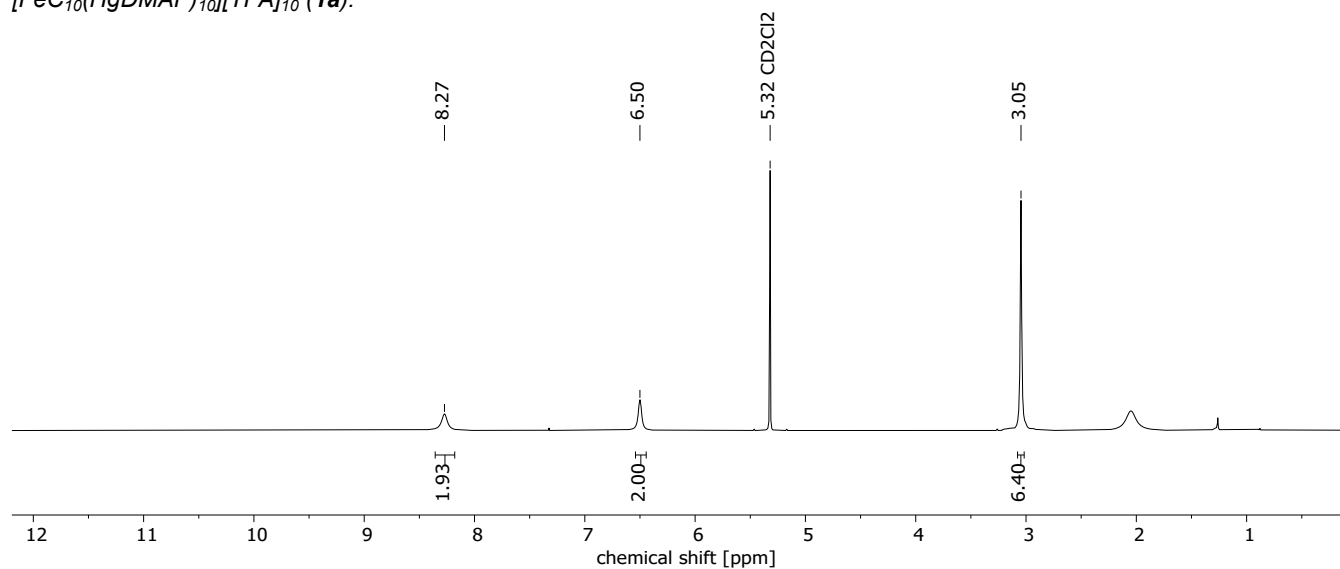

**Figure S1.**  $^1\text{H}$  NMR spectrum of  $[\text{FeC}_{10}(\text{HgDMAP})_{10}][\text{TFA}]_{10}$  (600 MHz,  $\text{CD}_2\text{Cl}_2$ , r.t.).

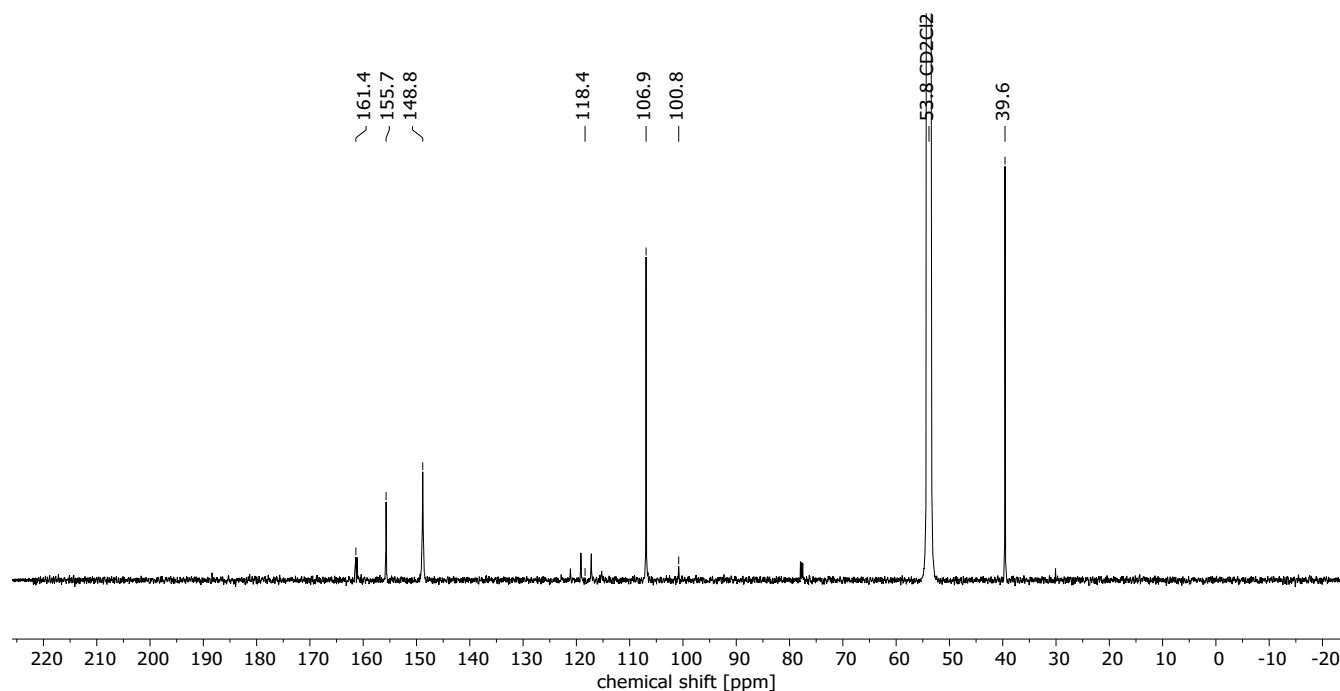

**Figure S2.**  $^{13}\text{C}$  NMR spectrum of  $[\text{FeC}_{10}(\text{HgDMAP})_{10}][\text{TFA}]_{10}$  (151 MHz,  $\text{CD}_2\text{Cl}_2$ , r.t.).



## SUPPORTING INFORMATION

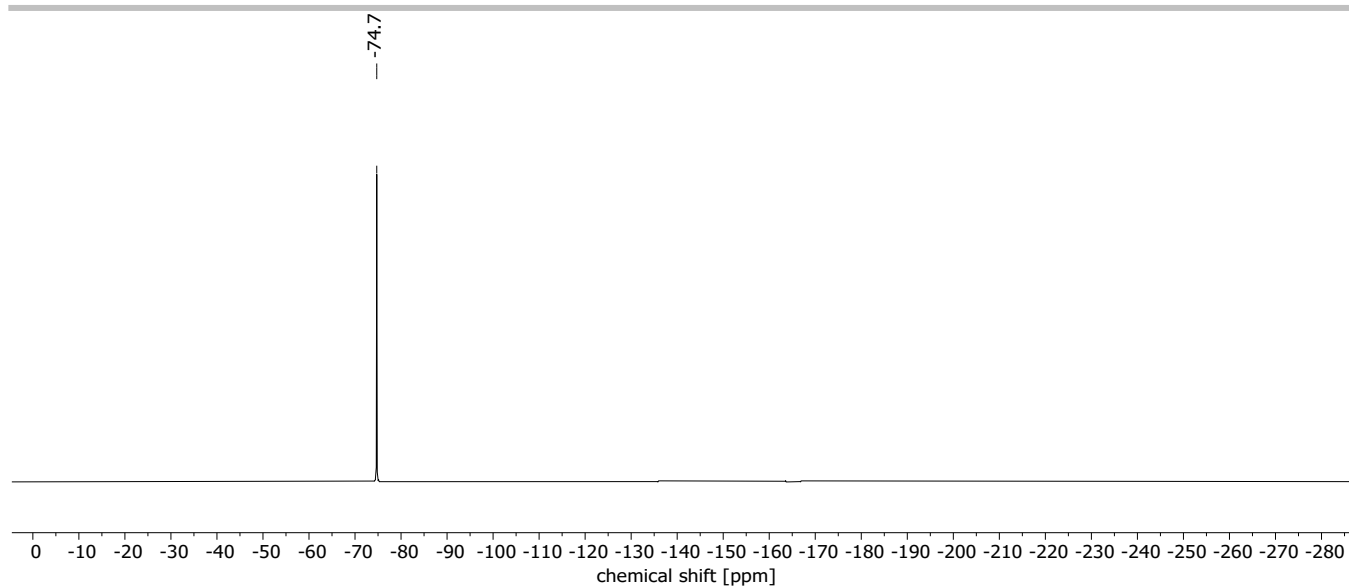

**Figure S3.**  $^{19}\text{F}$  NMR spectrum of  $[\text{FeC}_{10}(\text{HgDMAP})_{10}][\text{TFA}]_{10}$  (565 MHz,  $\text{CD}_2\text{Cl}_2$ , r.t.).

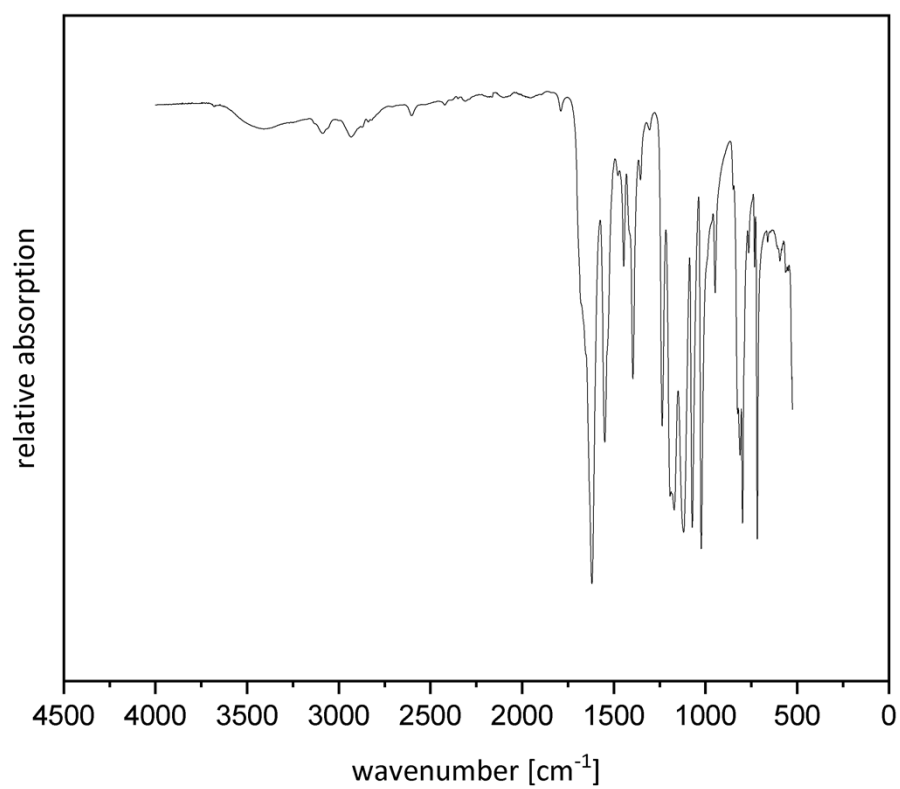

**Figure S4.** Infrared spectrum (ATR) of  $[\text{FeC}_{10}(\text{HgDMAP})_{10}][\text{TFA}]_{10}$ .

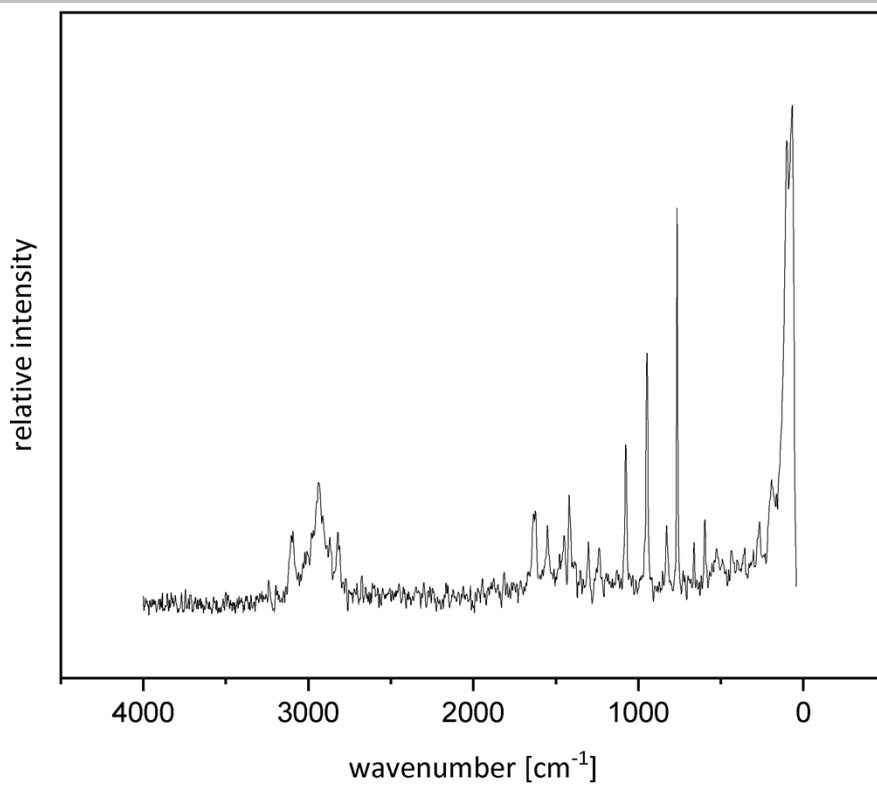

**Figure S5.** Raman spectrum (1064 nm, r.t.) of  $[\text{FeC}_{10}(\text{HgDMP})_{10}][\text{TFA}]_{10}$ .

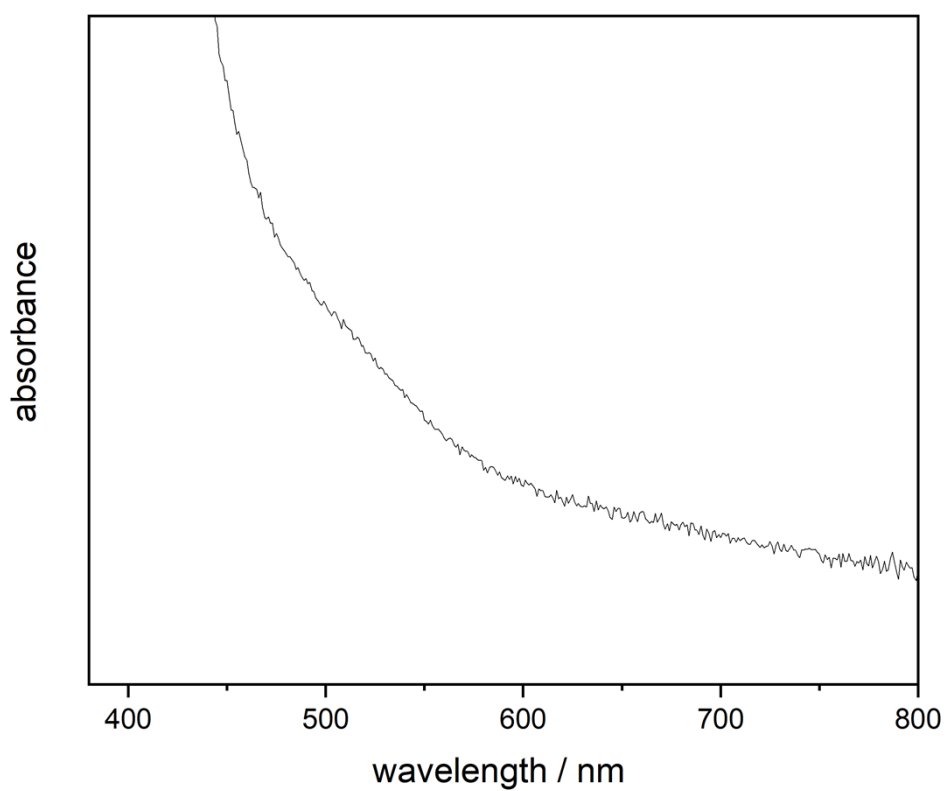

**Figure S6.** UV/Vis spectrum of  $[\text{FeC}_{10}(\text{HgDMP})_{10}][\text{TFA}]_{10}$  in DCM.

$[\text{FeC}_{10}\text{Hg}_{10}(\text{NC}_5\text{F}_5)_n][\text{SbF}_6]_{10}$  (**2a**):

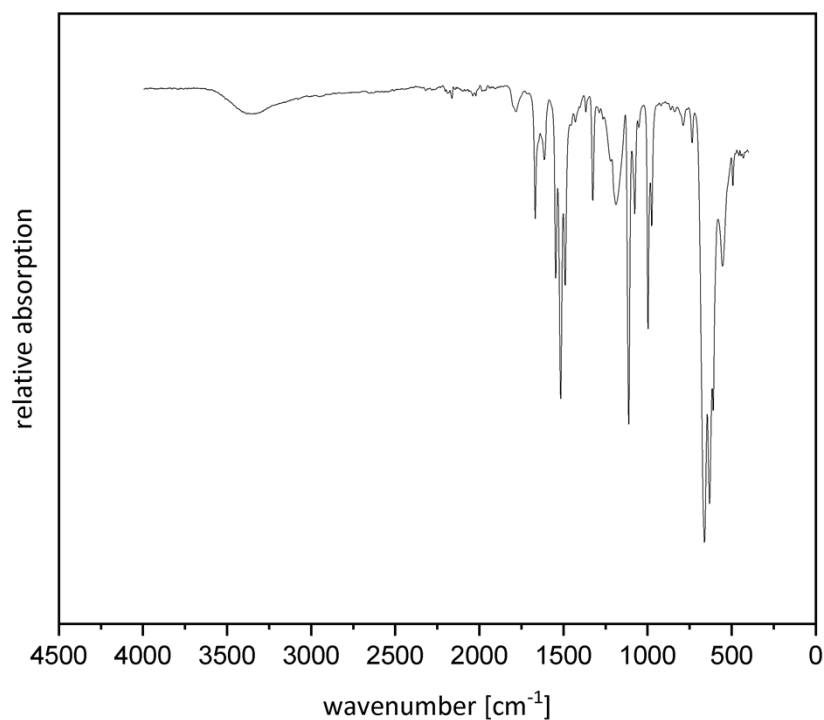

**Figure S7.** Infrared spectrum (ATR) of  $[\text{FeC}_{10}\text{Hg}_{10}(\text{NC}_5\text{F}_5)_n][\text{SbF}_6]_{10}$ .

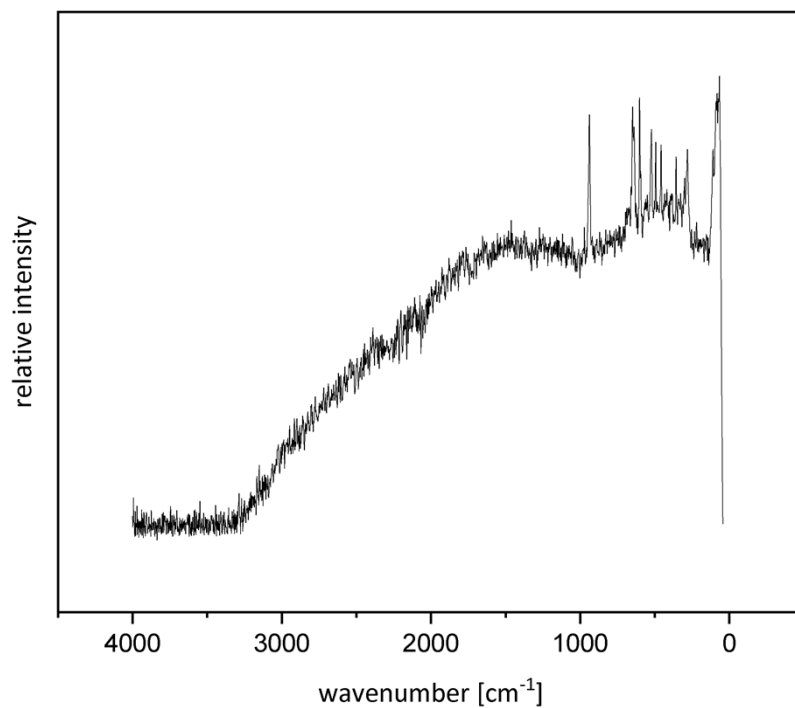

**Figure S8** Raman spectrum (1064 nm, r.t.) of  $[\text{FeC}_{10}\text{Hg}_{10}(\text{NC}_5\text{F}_5)_n][\text{SbF}_6]_{10}$ .

## SUPPORTING INFORMATION

$[\text{FeC}_{10}\text{Hg}_{10}(\text{THT})_{10}][\text{SbF}_6]_{10}$  (**2b**):

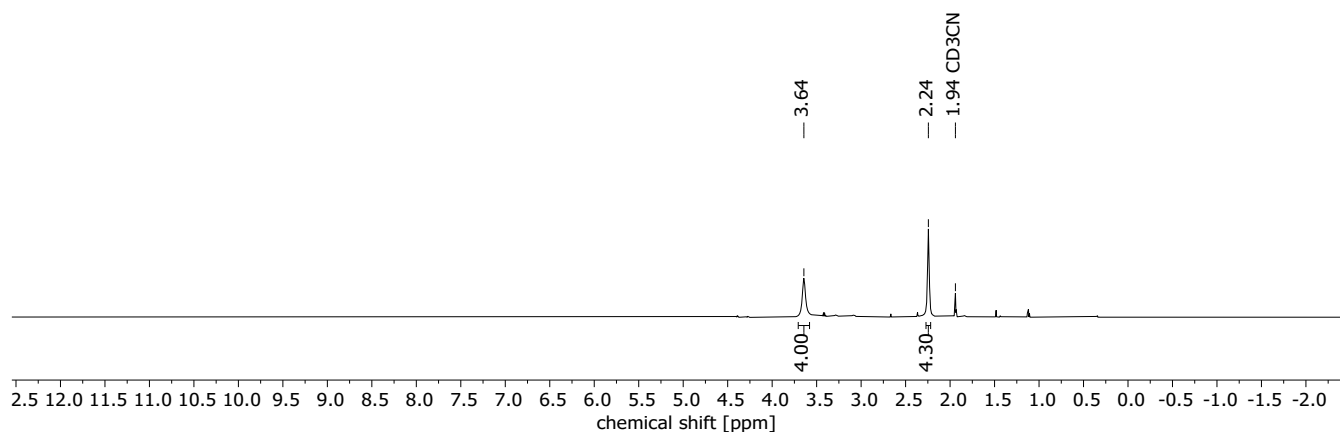

**Figure S9.**  $^1\text{H}$  NMR spectrum of  $[\text{FeC}_{10}\text{Hg}_{10}(\text{THT})_{10}][\text{SbF}_6]_{10}$  (600 MHz,  $\text{MeCN-d}_3$ , r.t.).

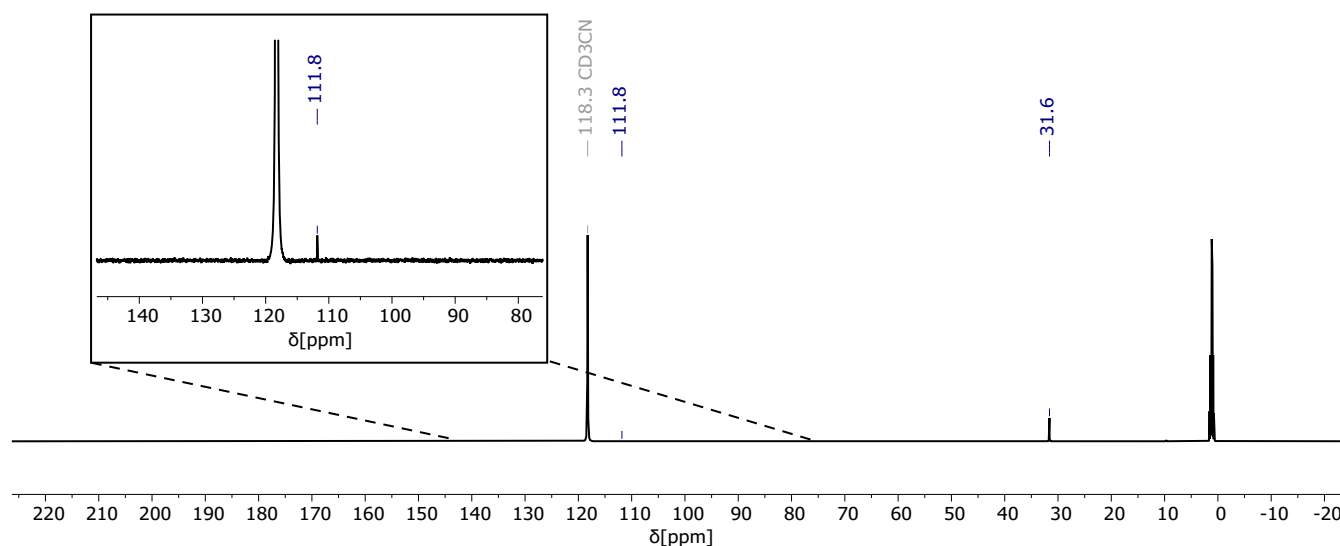

**Figure S10.**  $^{13}\text{C}$  NMR spectrum of  $[\text{FeC}_{10}\text{Hg}_{10}(\text{THT})_{10}][\text{SbF}_6]_{10}$  (151 MHz,  $\text{MeCN-d}_3$ , r.t.).

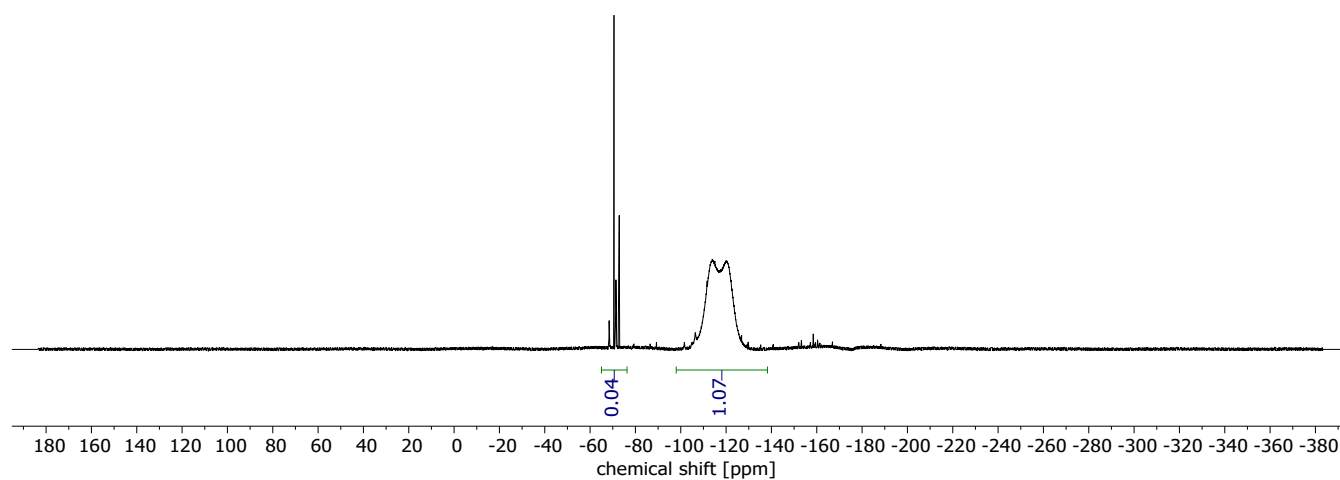

**Figure S11.**  $^{19}\text{F}$  NMR spectrum of  $[\text{FeC}_{10}\text{Hg}_{10}(\text{THT})_{10}][\text{SbF}_6]_{10}$  (565 MHz,  $\text{MeCN-d}_3$ , r.t.).

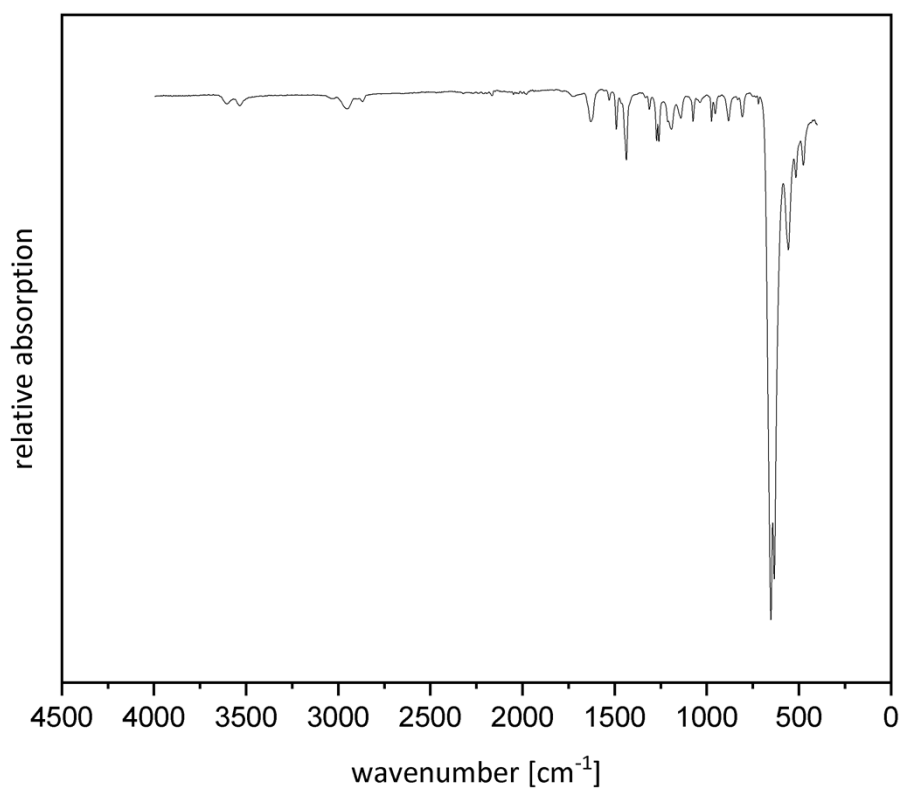

**Figure S12.** Infrared spectrum of  $[\text{FeC}_{10}\text{Hg}_{10}(\text{THT})_{10}][\text{SbF}_6]_{10}$  (ATR).

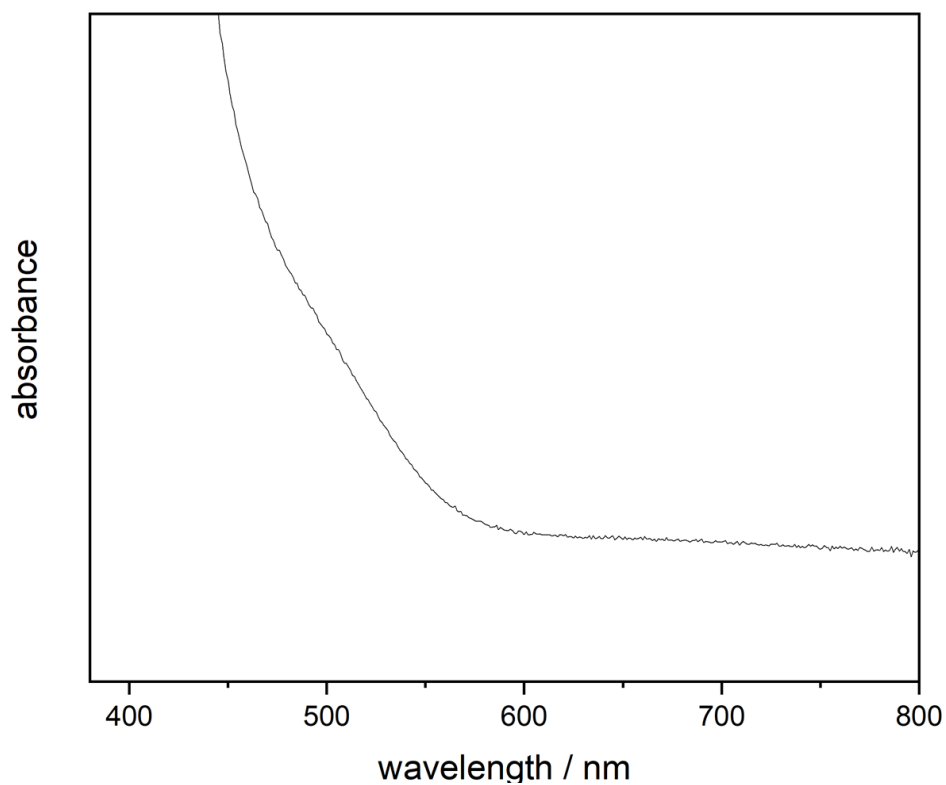

**Figure S13.** UV/Vis spectrum of  $[\text{FeC}_{10}\text{Hg}_{10}(\text{THT})_{10}][\text{SbF}_6]_{10}$  in acetonitrile.

## SUPPORTING INFORMATION

$[\text{FeC}_{10}\text{Hg}_{10}(\text{MeCN})_{10}][\text{SbF}_6]_{10}$  (**2c**):

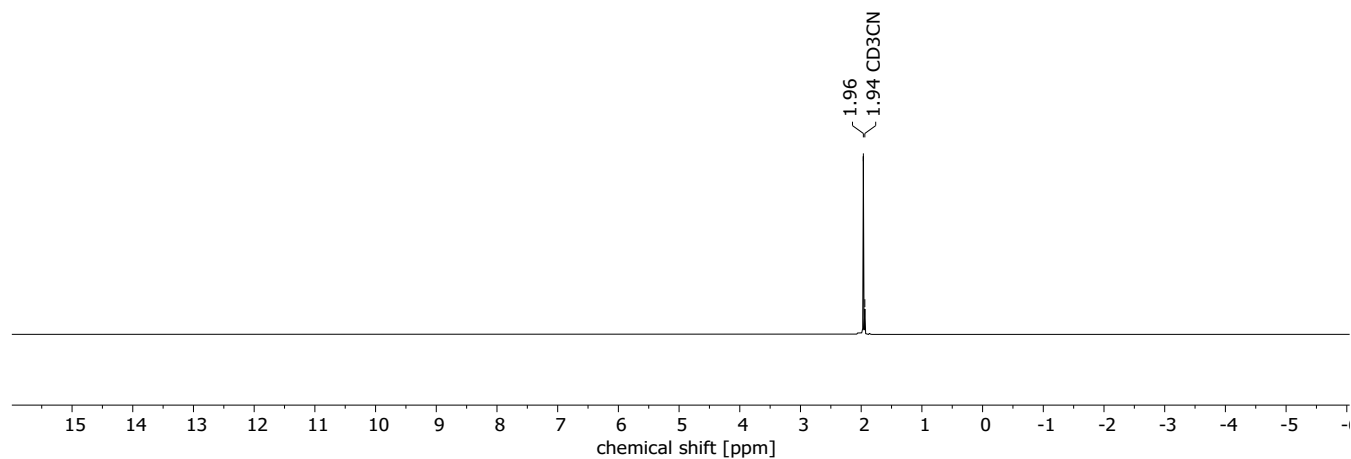

**Figure S14.**  $^1\text{H}$  NMR spectrum of  $[\text{FeC}_{10}\text{Hg}_{10}(\text{MeCN})_{10}][\text{SbF}_6]_{10}$  (700 MHz,  $\text{MeCN-d}_3$ , r.t.).

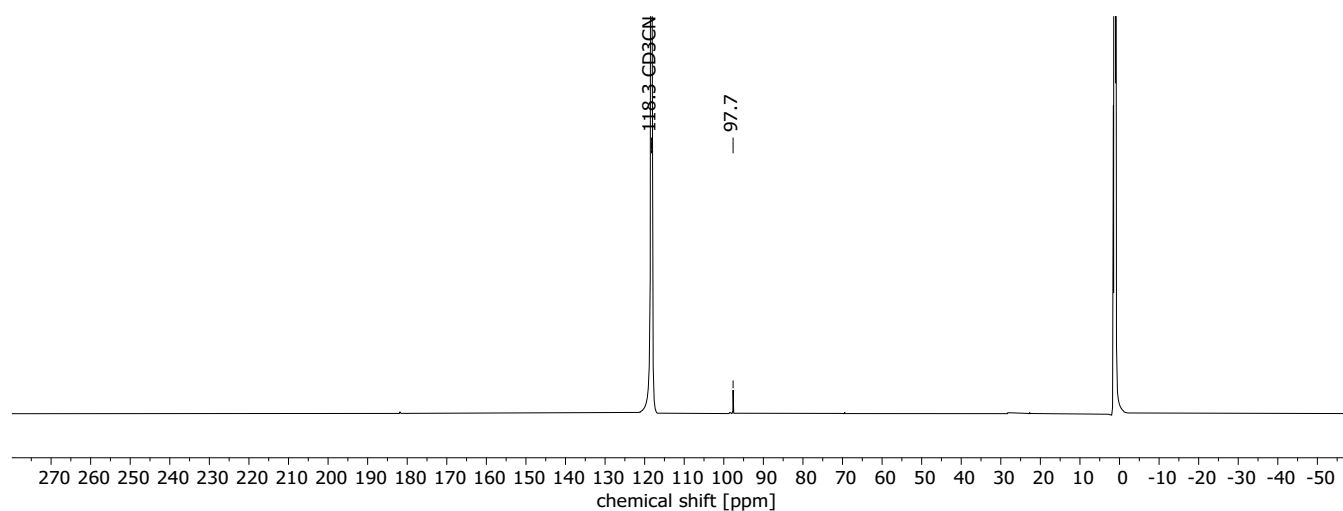

**Figure S15.**  $^{13}\text{C}$  NMR spectrum of  $[\text{FeC}_{10}\text{Hg}_{10}(\text{MeCN})_{10}][\text{SbF}_6]_{10}$  (176 MHz,  $\text{MeCN-d}_3$ , r.t.).

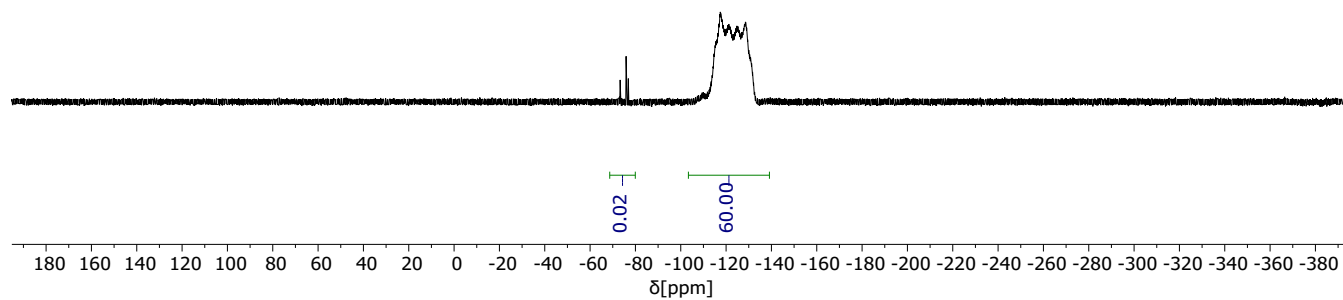

**Figure S16.**  $^{19}\text{F}$  NMR spectrum of  $[\text{FeC}_{10}\text{Hg}_{10}(\text{MeCN})_{10}][\text{SbF}_6]_{10}$  (565 MHz,  $\text{MeCN-d}_3$ , r.t.).

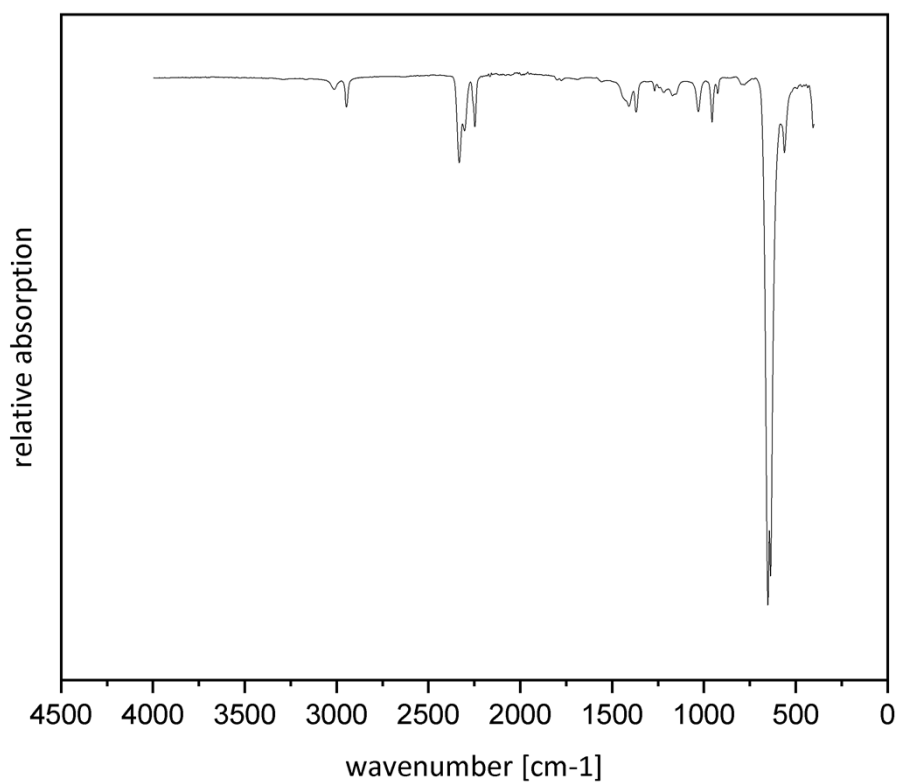

**Figure S17.** Infrared spectrum of  $[\text{FeC}_{10}\text{Hg}_{10}(\text{MeCN})_{10}][\text{SbF}_6]_{10}$  (ATR).

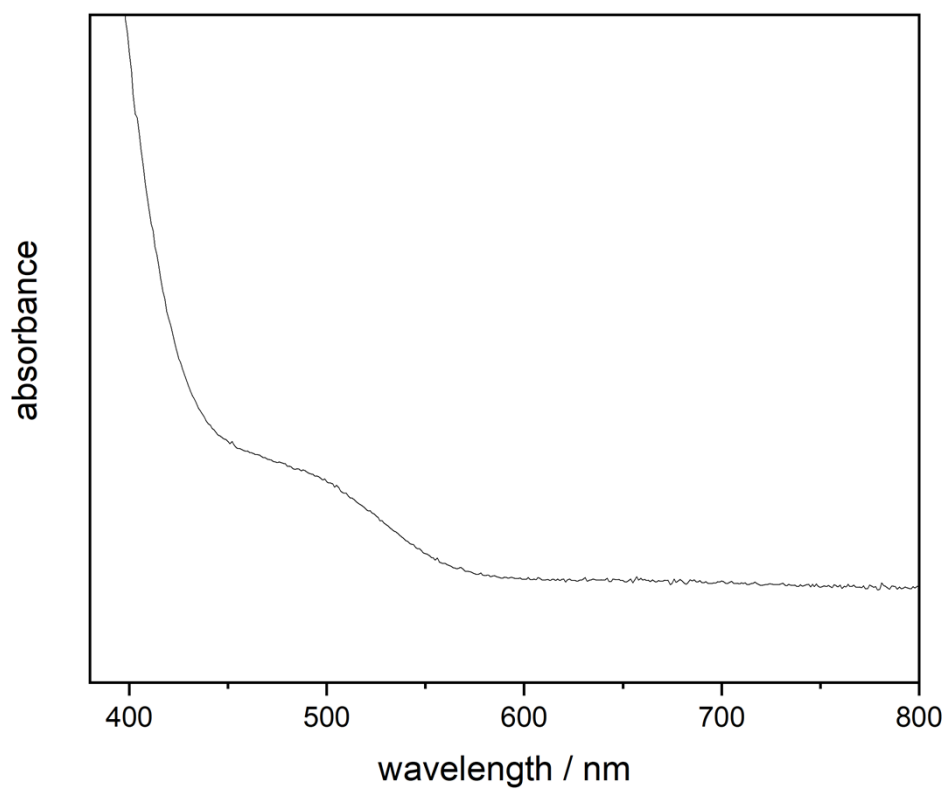

**Figure S18.** UV/vis spectrum of  $[\text{FeC}_{10}\text{Hg}_{10}(\text{MeCN})_{10}][\text{SbF}_6]_{10}$  in acetonitrile.

$[\text{FeC}_{10}\text{Hg}_{10}(\text{MeCN})_{10}][\text{SbF}_6]_{10}[\text{MoF}_6]$  (**3**):

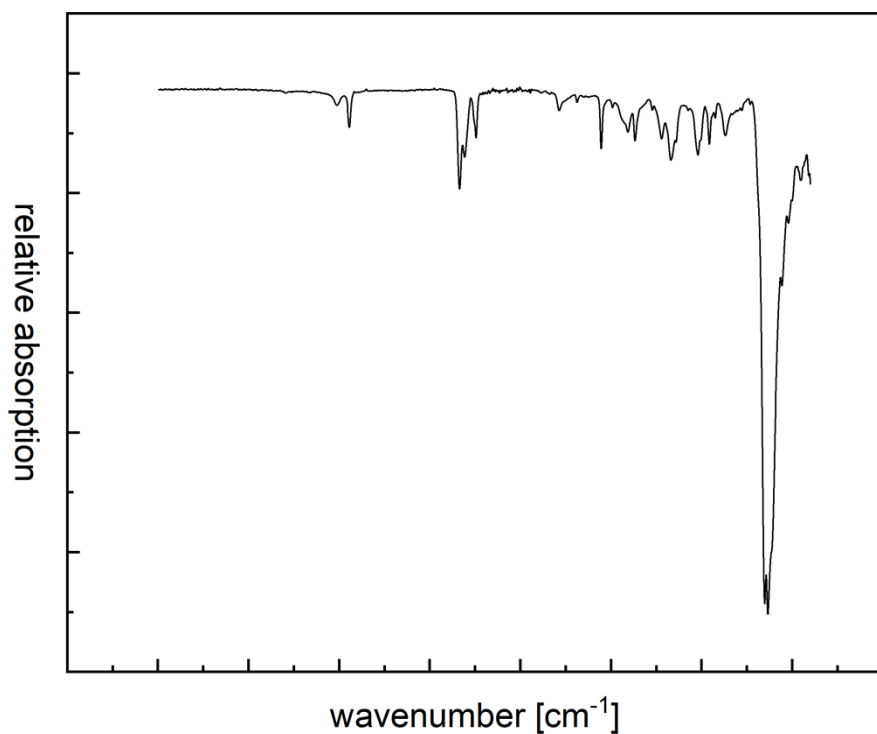

**Figure S19.** Infrared spectrum of  $[\text{FeC}_{10}\text{Hg}_{10}(\text{MeCN})_{10}][\text{SbF}_6]_{10}[\text{MoF}_6]$  (ATR).

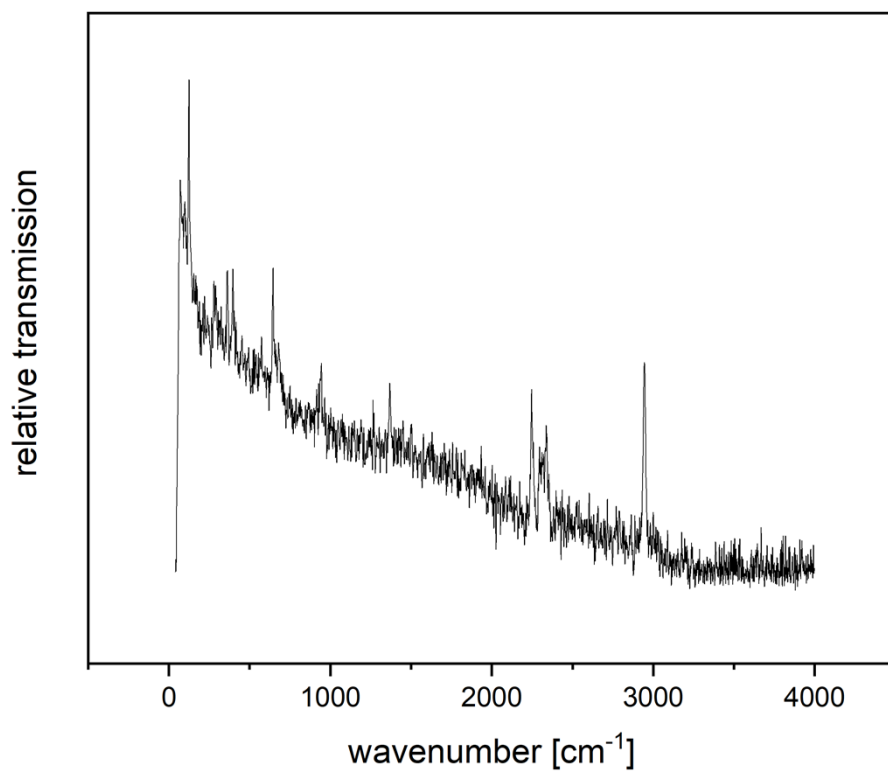

**Figure S20.** Raman spectrum (1064 nm, r.t.) of  $[\text{FeC}_{10}\text{Hg}_{10}(\text{MeCN})_{10}][\text{SbF}_6]_{10}[\text{MoF}_6]$ .



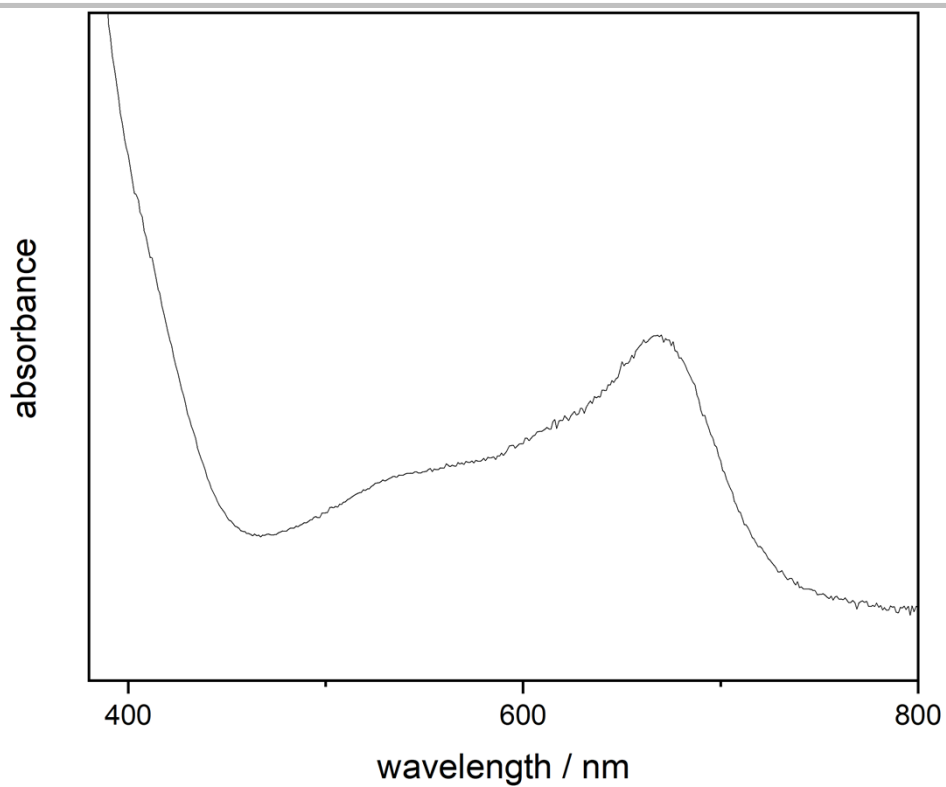

**Figure S21.** UV/vis spectrum of  $[\text{FeC}_{10}\text{Hg}_{10}(\text{MeCN})_{10}][\text{SbF}_6]_{10}[\text{MoF}_6]$  in acetonitrile.  $\lambda_{\text{max}} = 668 \text{ nm}$ .

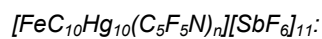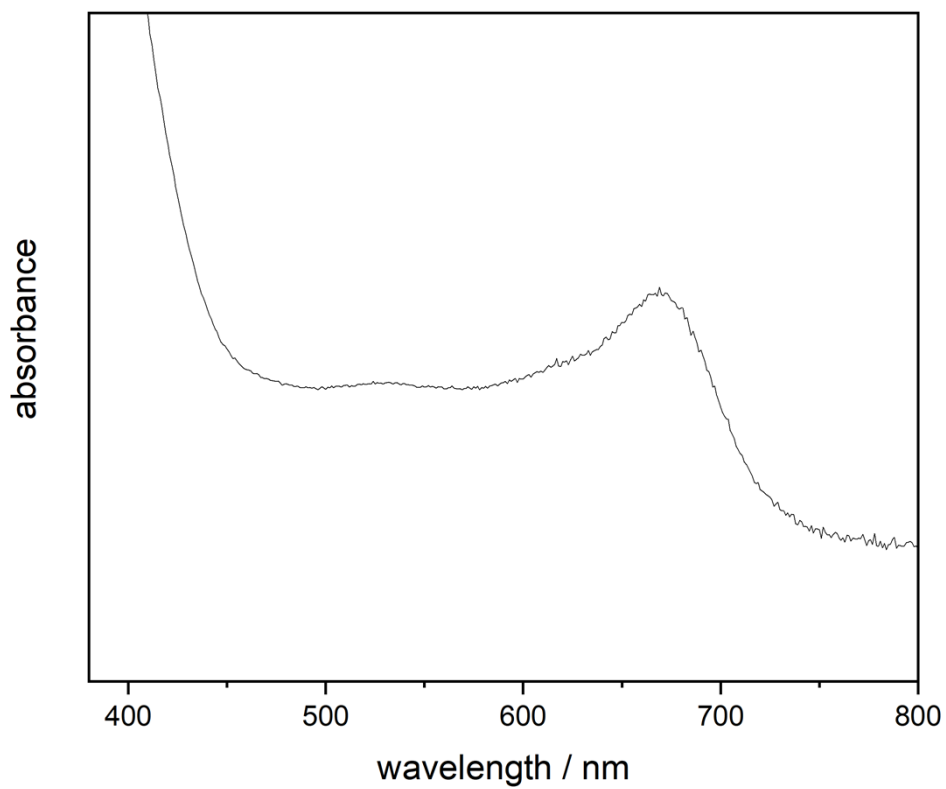

**Figure S22.** UV/vis spectrum of  $[\text{FeC}_{10}\text{Hg}_{10}(\text{C}_5\text{F}_5\text{N})_n][\text{SbF}_6]_{11}$  in acetonitrile synthesized by oxidation of  $[\text{FeC}_{10}\text{Hg}_{10}(\text{C}_5\text{F}_5\text{N})_n][\text{SbF}_6]_{10}$  with  $\text{NO}_2\text{SbF}_6$ .  $\lambda_{\text{max}} = 669 \text{ nm}$ .

$[\text{FeC}_{10}\text{Hg}_{10}(\text{THT})_{10}][\text{SbF}_6]_{11}$ :

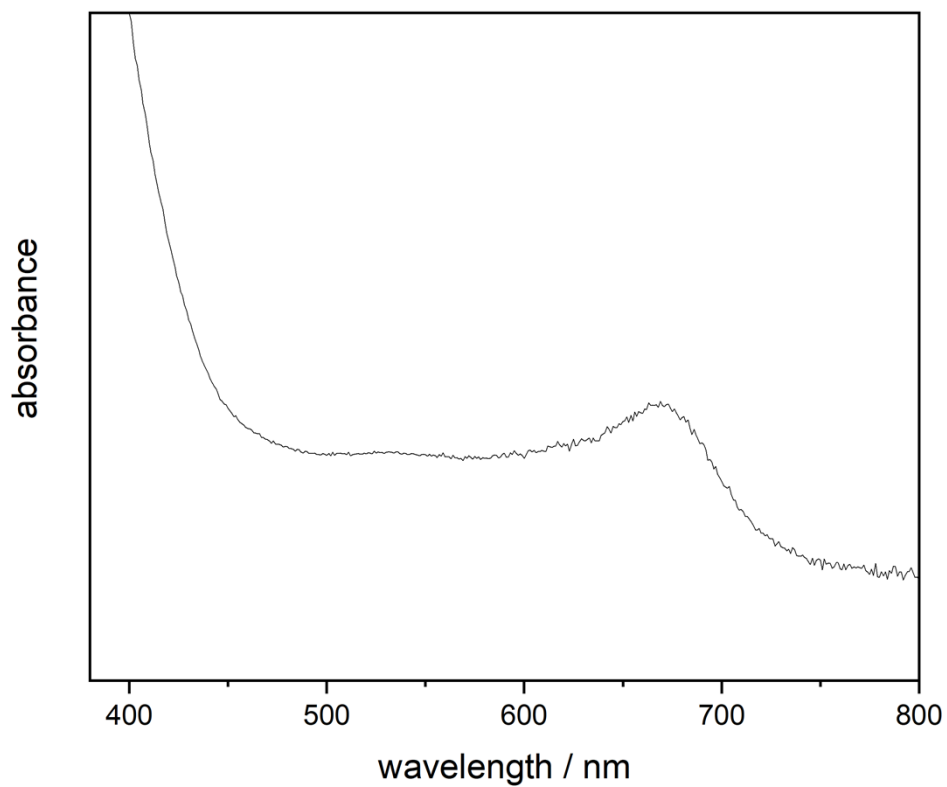

**Figure S23.** UV/vis spectrum of  $[\text{FeC}_{10}\text{Hg}_{10}(\text{THT})_{10}][\text{SbF}_6]_{11}$  in acetonitrile synthesized by oxidation of  $[\text{FeC}_{10}\text{Hg}_{10}(\text{THT})_{10}][\text{SbF}_6]_{10}$  with  $\text{NO}_2\text{SbF}_6$ .  $\lambda_{\text{max}} = 673 \text{ nm}$ .

## Cyclic voltammograms

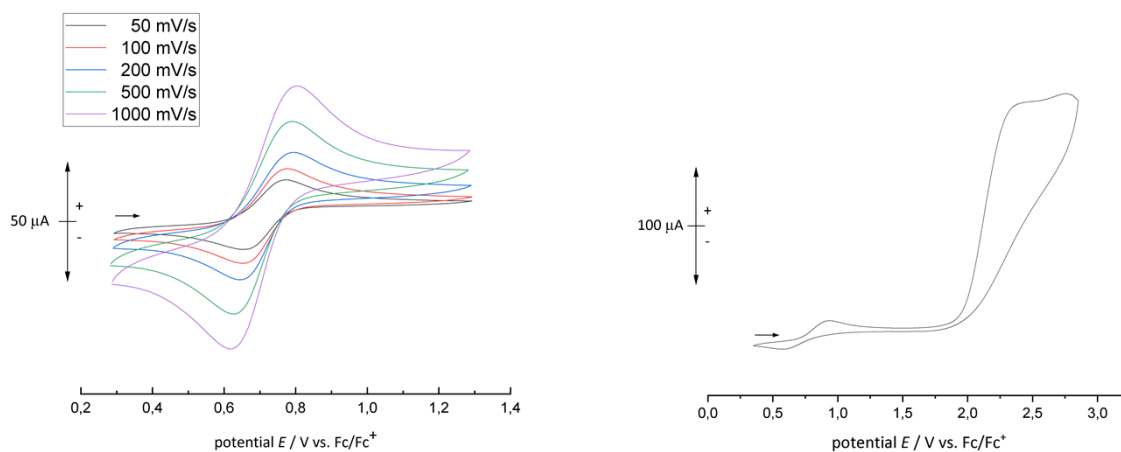

**Figure S24.** Cyclic voltammograms of  $[\text{FeC}_{10}(\text{HgMeCN})_{10}][\text{SbF}_6]_{10}$  in MeCN without supporting electrolyte at room temperature. First oxidation at different scan rates (left) and full cyclic voltammogram within the oxidation window of MeCN at 100 mV/s (right).

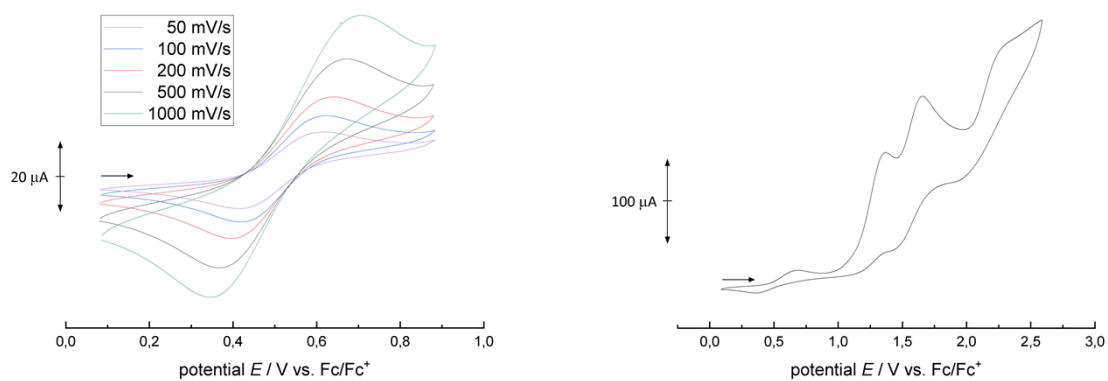

**Figure S25.** Cyclic voltammograms of  $[\text{FeC}_{10}(\text{HgTHT})_{10}][\text{SbF}_6]_{10}$  in MeCN without supporting electrolyte at room temperature. First oxidation at different scan rates (left) and full cyclic voltammogram within the oxidation window of MeCN at 100 mV/s (right).

## Crystal Packing

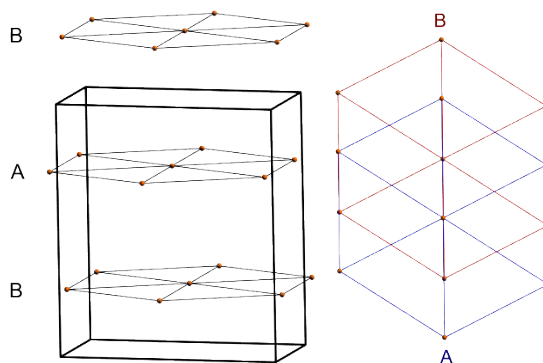

**Figure S26.** Packing of iron atoms in crystal structure of  $[\text{FeC}_{10}(\text{HgTHT})_{10}][\text{SbF}_6]_{10} \cdot 24 \text{ MeCN}$ .
